# Supplementary material for: Spin modification of iron(ii) complexes via covalent (dative) and dispersion guided non-covalent bonding with N-heterocyclic carbenes: DFT, DLPNO-CCSD(T) and MCSCF studies
Source: Royal Society of Chemistry journal article supplement (doi:10.1039/c9dt04334a), 2019-11-21
Supplement: c9dt04334a1.pdf [file c9dt04334a1.pdf]

## Electronic Supplementary Information (ESI)

# Spin modification in iron(II) complexes via covalent (dative) and dispersion guided non-covalent bonding with N-heterocyclic carbenes: DFT, DLPNO-CCSD(T) and MCSCF studies

Debashree Manna,<sup>a,b†</sup> Rabindranath Lo,<sup>a,b†</sup> and Pavel Hobza<sup>\*a,b</sup>

<sup>a</sup>Institute of Organic Chemistry and Biochemistry, Academy of Sciences of the Czech Republic, v.v.i., Flemingovo nám. 2, 16610 Prague 6, Czech Republic.

<sup>b</sup>Regional Centre of Advanced Technologies and Materials, Palacký University, 77146 Olomouc, Czech Republic.

† Both authors contributed equally to this work and can be considered as the first author.

Email: [pavel.hobza@uochb.cas.cz](mailto:pavel.hobza@uochb.cas.cz)

**Table S1:** Relative energies (kcal/mol) of Carbenes at singlet (S) and triplet (T) in various levels

of theory and HOMO-LUMO gap (eV) of singlet carbenes are given.

|                                     |   | B97<br>-D3 | BLYP<br>-D3 | PBE-<br>D3 | B3LYP<br>-D3 | PBE0<br>-D3 | B2-<br>PLYP<br>-D3 | DLPNO-<br>CCSD(T) | CCSD(T) | H-L Gap |
|-------------------------------------|---|------------|-------------|------------|--------------|-------------|--------------------|-------------------|---------|---------|
| ImNH <sub>2</sub>                   | S | 0.0        | 0.0         | 0.0        | 0.0          | 0.0         | 0.0                | 0.0               | 0.0     | 6.624   |
|                                     | T | 83.7       | 84.2        | 83.9       | 85.4         | 84.3        | 81.9               | 88.7              | 73.0    |         |
| ImN(CH <sub>3</sub> ) <sub>2</sub>  | S | 0.0        | 0.0         | 0.0        | 0.0          | 0.0         | 0.0                | 0.0               | 0.0     | 6.337   |
|                                     | T | 82.2       | 82.3        | 82.4       | 84.5         | 84.4        | 83.8               | 91.0              | 99.0    |         |
| ImN(CF <sub>3</sub> ) <sub>2</sub>  | S | 0.0        | 0.0         | 0.0        | 0.0          | 0.0         | 0.0                | 0.0               | 0.0     | 6.561   |
|                                     | T | 74.6       | 75.9        | 75.5       | 76.2         | 76.4        | 74.5               | 84.1              | 92.6    |         |
| ImN(CCl <sub>3</sub> ) <sub>2</sub> | S | 0.0        | 0.0         | 0.0        | 0.0          | 0.0         | 0.0                | 0.0               | 0.0     | 5.271   |
|                                     | T | 60.5       | 62.1        | 64.2       | 66.6         | 70.3        | 71.8               | 89.7              | 81.7    |         |

**Table S2:** Mulliken and ESP charges on carbene carbon, first proton affinities (kcal/mol) and dimerization energies (kcal/mol) for the studied carbenes.

|                                     | Mulliken | ESP    | First PA | Dimerization energy |
|-------------------------------------|----------|--------|----------|---------------------|
| ImNH <sub>2</sub>                   | -0.249   | -0.802 | 263.3    | -13.1               |
| ImN(CH <sub>3</sub> ) <sub>2</sub>  | -0.325   | -0.948 | 272.3    | -3.9                |
| ImN(CF <sub>3</sub> ) <sub>2</sub>  | -0.265   | -0.760 | 246.9    | -0.1                |
| ImN(CCl <sub>3</sub> ) <sub>2</sub> | -0.242   | -0.685 | 254.9    | -3.3                |

**Table S3:** Interaction energies (kcal/mol) of FePc carbene complexes at B97-D3/TZVPP level.

|                                            | $\Delta E_{\text{int}}$ |
|--------------------------------------------|-------------------------|
| FePc...ImNH <sub>2</sub>                   | -45.5                   |
| FePc...ImN(CH <sub>3</sub> ) <sub>2</sub>  | -35.7                   |
| FePc...ImN(CF <sub>3</sub> ) <sub>2</sub>  | -12.4                   |
| FePc...ImN(CCl <sub>3</sub> ) <sub>2</sub> | -14.5                   |

**Table S4:** Relative energies (kcal/mol) of FePz...carbenes at various levels. CASPT2 values are given in parenthesis.

|                                            |   | B97-D3 | BLYP-D3 | PBE-D3 | B3LYP-D3 | PBE0-D3 | B2-PLYP-D3 | CASSCF         | DLPNO-CCSD(T) |
|--------------------------------------------|---|--------|---------|--------|----------|---------|------------|----------------|---------------|
| FePz...ImNH <sub>2</sub>                   | S | 0.0    | 0.0     | 0.0    | 0.0      | 0.0     | 8.6        | 0.0            | 0.0           |
|                                            | T | 15.9   | 19.8    | 21.2   | 9.2      | 6.6     | 0.0        | 10.7           | 44.4          |
|                                            | Q | 27.5   | 33.0    | 34.0   | 18.1     | 13.2    | 10.3       | (12.3)<br>38.6 | 11.6          |
| FePz...ImN(CH <sub>3</sub> ) <sub>2</sub>  | S | 0.0    | 0.0     | 0.0    | 0.7      | 2.5     | 32.2       | 0.0            | 0.0           |
|                                            | T | 6.2    | 11.0    | 12.8   | 0.0      | 0.0     | 16.0       | 20.6           | 39.2          |
|                                            | Q | 13.2   | 28.7    | 30.0   | 6.4      | 2.7     | 0.0        | (28.6)<br>---  | 51.4          |
| FePz...ImN(CF <sub>3</sub> ) <sub>2</sub>  | S | 1.4    | 0.0     | 0.0    | 8.4      | 10.6    | 41.9       | 2.2            | 2.9           |
|                                            | T | 0.0    | 4.5     | 5.3    | 0.0      | 0.0     | 13.6       | 0.0            | 0.0           |
|                                            | Q | 6.4    | 21.5    | 21.9   | 6.9      | 1.8     | 0.0        | ----           | 31.3          |
| FePz...ImN(CCl <sub>3</sub> ) <sub>2</sub> | S | 6.8    | 1.9     | 2.2    | 21.5     | 26.4    | 57.8       | 64.5           | 15.3          |
|                                            | T | 0.0    | 0.0     | 0.0    | 0.0      | 0.0     | 0.0        | 0.0            | 0.0           |
|                                            | Q | 10.4   | 21.0    | 21.1   | 14.3     | 11.5    | 4.1        | 26.7           | 35.0          |

**Table S5:** Wiberg Bond Index and out-plane displacement (in Å) of Fe atom from the plane of FePz for FePz...Carbene complexes.

|                                            | Spin State | Wiberg Bond index (WBI) | Out-of-plane displacement |          |
|--------------------------------------------|------------|-------------------------|---------------------------|----------|
|                                            |            |                         | B97-D3                    | B3LYP-D3 |
| FePz...ImNH <sub>2</sub>                   | S          | 0.955                   | 0.145                     | 0.154    |
| FePz...ImN(CH <sub>3</sub> ) <sub>2</sub>  | S          | 0.910                   | 0.433                     | 0.458    |
| FePz...ImN(CF <sub>3</sub> ) <sub>2</sub>  | T          | 0.390                   | 0.464                     | 0.369    |
| FePz...ImN(CCl <sub>3</sub> ) <sub>2</sub> | T          | 0.053                   | 0.106                     | 0.091    |

**Table S6:** NBO and ESP charge transfer from carbenes to FePz molecule. The second order perturbation energy (kcal/mol),  $E^{(2)}$  for back-bonding contribution for selected complexes.

|                                            |   | NBO    | ESP    | $E^{(2)}$ |
|--------------------------------------------|---|--------|--------|-----------|
| FePz...ImNH <sub>2</sub>                   | S | -0.657 | -0.248 | 55.2      |
|                                            | T | -0.393 | -0.232 |           |
|                                            | Q | -0.427 | -0.269 |           |
| FePz...ImN(CH <sub>3</sub> ) <sub>2</sub>  | S | -0.647 | -0.217 | 39.2      |
|                                            | T | -0.387 | -0.188 |           |
|                                            | Q | -0.394 |        |           |
| FePz...ImN(CF <sub>3</sub> ) <sub>2</sub>  | S | -0.440 | -0.045 | 12.3      |
|                                            | T | -0.247 | -0.121 |           |
|                                            | Q | -0.198 | -0.103 |           |
| FePz...ImN(CCl <sub>3</sub> ) <sub>2</sub> | S | -0.293 | 0.054  | 0.9       |
|                                            | T | -0.038 | 0.005  |           |
|                                            | Q | -0.115 | -0.045 |           |

**Table S7:** Calculated interaction energies ( $\Delta E$ , kcal/mol) and their decomposition into reference and correlation energies from DLPNO-CCSD(T) method.

|                                            |   | $\Delta E$ | $\Delta E_{\text{geo-prep}}$ | $\Delta E_{\text{int}}^{\text{ref}}$ | $\Delta E_{\text{el-prep}}^{\text{ref}}$ | $E_{\text{elstat}}$ | $E_{\text{exch}}$ | $\Delta E_{\text{int}}^{\text{Corr}}$ | $E_{\text{disp}}$ | $\Delta E_{\text{int}}^{\text{C-(T)}}$ | $\Delta E_{\text{no-disp}}$ |
|--------------------------------------------|---|------------|------------------------------|--------------------------------------|------------------------------------------|---------------------|-------------------|---------------------------------------|-------------------|----------------------------------------|-----------------------------|
| FePz...ImNH <sub>2</sub>                   | S | -33.5      | 31.0                         | -9.9                                 | 717.9                                    | -634.6              | -93.2             | -54.6                                 | -25.5             | -6.7                                   | -22.4                       |
|                                            | T | 10.5       | 0.5                          | 49.2                                 | 613.2                                    | -507.3              | -56.7             | -39.2                                 | -14.2             | -4.8                                   | -20.3                       |
| FePz...ImN(CH <sub>3</sub> ) <sub>2</sub>  | S | -26.8      | 39.7                         | -10.8                                | 607.2                                    | -534.7              | -83.3             | -55.8                                 | -28.6             | -6.7                                   | -20.4                       |
|                                            | T | 12.1       | 4.4                          | 46.3                                 | 525.9                                    | -428.2              | -51.4             | -38.6                                 | -18.6             | -5.4                                   | -14.6                       |
| FePz...ImN(CF <sub>3</sub> ) <sub>2</sub>  | S | -7.6       | 52.8                         | 1.4                                  | 623.3                                    | -534.3              | -87.6             | -61.8                                 | -31.6             | -228.2                                 | 198.1                       |
|                                            | T | -10.1      | 5.5                          | 6.5                                  | 186.7                                    | -149.2              | -31.0             | -22.1                                 | -16.5             | -2.0                                   | -3.6                        |
| FePz...ImN(CCl <sub>3</sub> ) <sub>2</sub> | S | 4.6        | 76.3                         | 10.7                                 | 787.8                                    | -664.5              | -112.6            | -82.4                                 | -44.2             | -11.2                                  | -27.0                       |
|                                            | T | -11.6      | 0.42                         | 7.0                                  | 57.3                                     | -38.6               | -11.7             | -19.1                                 | -15.2             | -1.6                                   | -2.3                        |

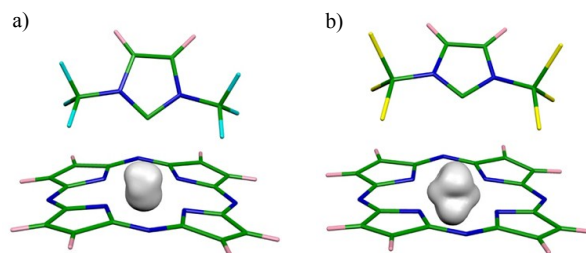

**Fig. S1** Spin density difference for triplet a) Fe(II)-porphyrazine...ImN(CF<sub>3</sub>)<sub>2</sub> and b) Fe(II)-porphyrazine...ImN(CCl<sub>3</sub>)<sub>2</sub> (C- green, H- pink, N- blue, Fe- dark orange, Cl- yellow, F- cyan).

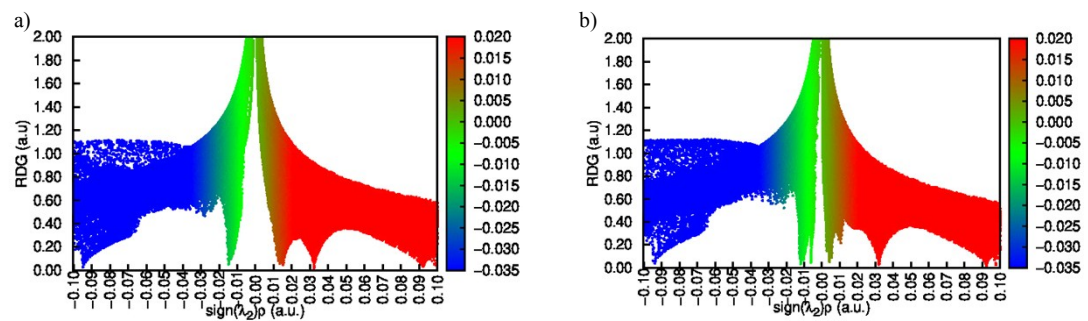

**Fig. S2** Plots of reduced density gradient (RDG) against  $\text{sign}(\lambda^2)\rho(r)$  for the a) FePz...ImNH<sub>2</sub> and b) FePz...ImN(CCl<sub>3</sub>)<sub>2</sub> complexes, using Multiwfn 3.6.
